# Supplementary material for: Renal Tubular Acidosis in Pregnant Critically Ill COVID-19 Patients: A Secondary Analysis of a Prospective Cohort
Source: MDPI journal article supplement (doi:10.3390/jcm11154273), 2022-07-22
Supplement: s1 [file s1]

## Supplementary File S1

**Supplementary File S1:** Individual acid base related characteristics

| Patient  | Pregnant   | Metabolic Acidosis | AG calculated | Cl <sup>-</sup> | Diarrhea   | dRTA       | Interpretation                                     |
|----------|------------|--------------------|---------------|-----------------|------------|------------|----------------------------------------------------|
| 1        | Yes        | Yes                | 8.2           | 116             | No         | Yes        |                                                    |
| 2        | Yes        | Yes                | 9.2           | 117             | No         | Yes        |                                                    |
| 3        | Yes        | Yes                | 14.3          | 112             | No         | No         | Hyperchloremic normal anion gap acidosis           |
| 4        | Yes        | Yes                | 17.5          | 124             | No         | No         | High anion gap acidosis                            |
| 5        | Yes        | Yes                | 6.5           | 112             | No         | Yes        |                                                    |
| 6        | Yes        | No                 | 12            | 110             | No         | No         |                                                    |
| 7        | Yes        | Yes                | 16.1          | 112             | No         | No         | High anion gap acidosis                            |
| <b>Ø</b> | <b>7/7</b> | <b>6/7</b>         | <b>12.0</b>   | <b>115</b>      | <b>0/7</b> | <b>3/7</b> |                                                    |
| 1        | No         | No                 | 9.1           | 111             | No         | No         |                                                    |
| 2        | No         | Yes                | 7.5           | 114             | No         | No         | Hyperchloremic normal anion gap metabolic acidosis |
| 3        | No         | No                 | 4             | 112             | No         | No         |                                                    |
| 4        | No         | No                 | 9.3           | 112             | No         | No         |                                                    |
| 5        | No         | No                 | 3.1           | 111             | No         | No         |                                                    |
| 6        | No         | Yes                | 14.4          | 123             | No         | No         | Hyperchloremic normal anion gap metabolic acidosis |
| 7        | No         | No                 | 6.5           | 108             | No         | No         |                                                    |
| <b>Ø</b> | <b>0/7</b> | <b>2/7</b>         | <b>7.7</b>    | <b>113</b>      | <b>0/7</b> | <b>0/7</b> |                                                    |
